# Supplementary material for: Exploring the effect of water chemistry regulation on the ultrafiltration performance of a new membrane with multi-walled carbon nanotube modification: based on real source water tests
Source: Royal Society of Chemistry journal article supplement (doi:10.1039/d4ew00952e), 2025-01-01
Supplement: d4ew00952e1.pdf [file d4ew00952e1.pdf]

## Supplementary Material Content

| Supplementary material caption                                                                                                                                                       | Page number |
|--------------------------------------------------------------------------------------------------------------------------------------------------------------------------------------|-------------|
| <b>Table S1.</b> Parameters of the experimental water samples from the Yao River.                                                                                                    | S2          |
| <b>Table S2.</b> Information on fluorescent peak position and indexes of the raw water from the Yao River.                                                                           | S3          |
| <b>Fig. S1.</b> Split-half analysis factor similarity score, core consistency, explanation rate, and residual results when using different component numbers in the PARAFAC process. | S4          |
| <b>Fig. S2.</b> $F_{\max}$ values of the three components in the feed water before filtration after different water quality regulations.                                             | S5          |
| <b>Fig. S3.</b> Location of fluorescent peaks of the three components obtained by PARAFAC.                                                                                           | S6          |

**Table S1.** Parameters of the experimental water samples from the Yao River.

| <b>Project</b> | <b>DOC (mg/L)</b> | <b>pH</b>   | <b>UV<sub>254</sub> (cm<sup>-1</sup>)</b> |
|----------------|-------------------|-------------|-------------------------------------------|
| Parameter      | 7.23 – 9.89       | 6.97 – 8.12 | 0.103 – 0.185                             |

**Table S2.** Information on fluorescent peak position and indexes of the raw water from the Yao River.

| <b>Fluorescent peaks<br/>(indexes )</b> | <b>Definition</b>           | <b>Position (Ex/Em)</b>                          |
|-----------------------------------------|-----------------------------|--------------------------------------------------|
| Peak N                                  | Unknown                     | 280/370 nm                                       |
| Peak D                                  | Unknown                     | 390/509 nm                                       |
| Peak C                                  | UVA humic-like              | 320–360/420–460 nm                               |
| Peak M                                  | UVA marine humic-like       | 290–310/370–410 nm                               |
| Peak A                                  | UVC humic-like              | 260/400–460 nm                                   |
| Peak T                                  | UVC protein-like            | Ex/Em = 275/340 nm                               |
| Peak B                                  | Tyrosine-like, protein-like | Ex/Em = 270/305 nm                               |
| BIX                                     | Biological index            | (310/380 nm)/(310/430 nm)                        |
| HIX                                     | Humification index          | (254/435–480 nm)/(254/300–345 nm+254/435–480 nm) |
| FreI                                    | Freshness index             | (310/380 nm)/(310/420–435 nm)                    |
| Flul                                    | Fluorescence index          | (370/470 nm)/(370/520 nm)                        |

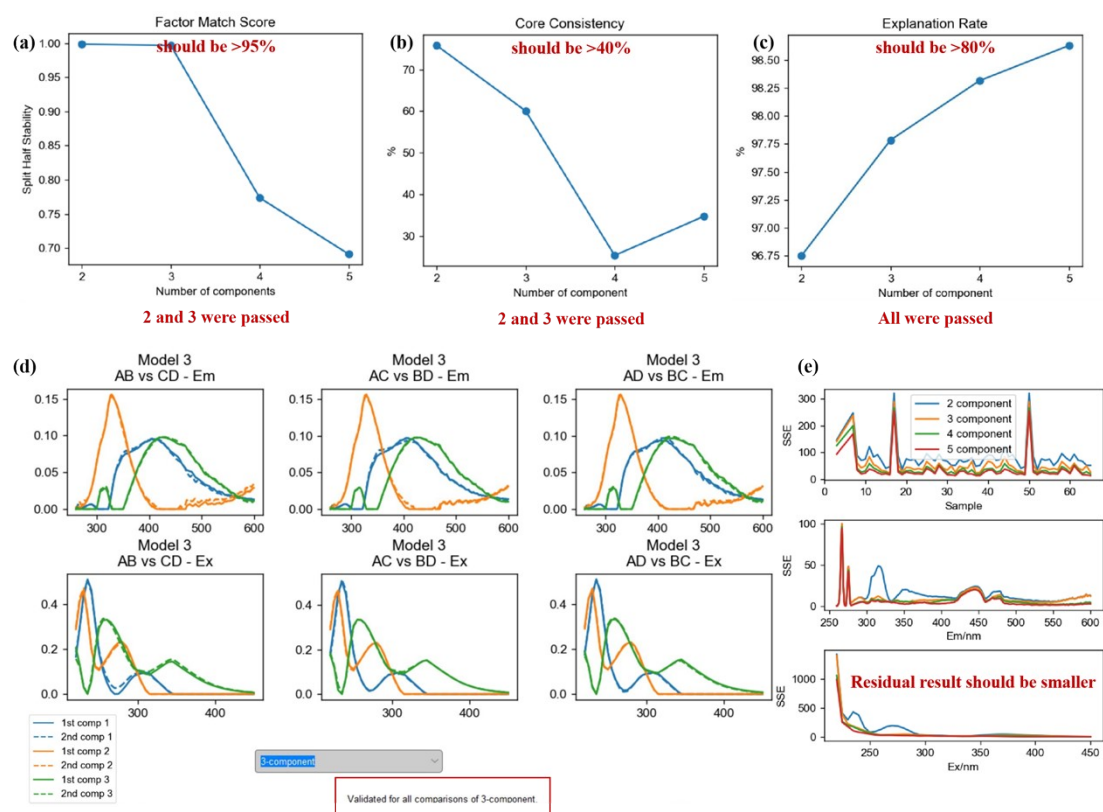

**Fig. S1.** Split-half analysis factor similarity score results (a and d), core consistency results (b), explanation rate results (c), and residual results (e) when using different component numbers in the PARAFAC process.

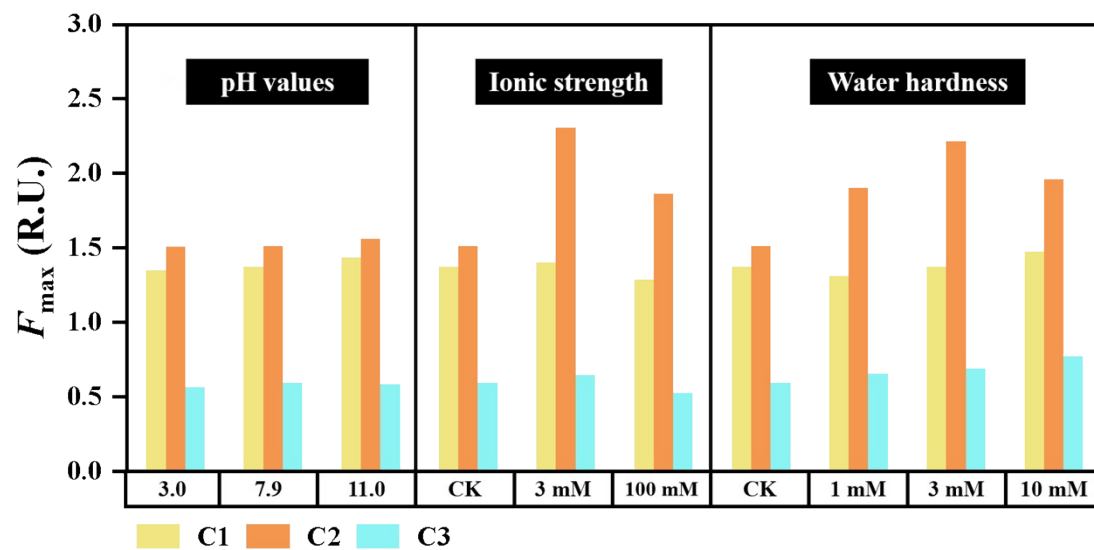

**Fig. S2.**  $F_{\max}$  values of the three components in the feed water before filtration after different water quality regulations, including the regulation of pH values, ionic strength, and water hardness.

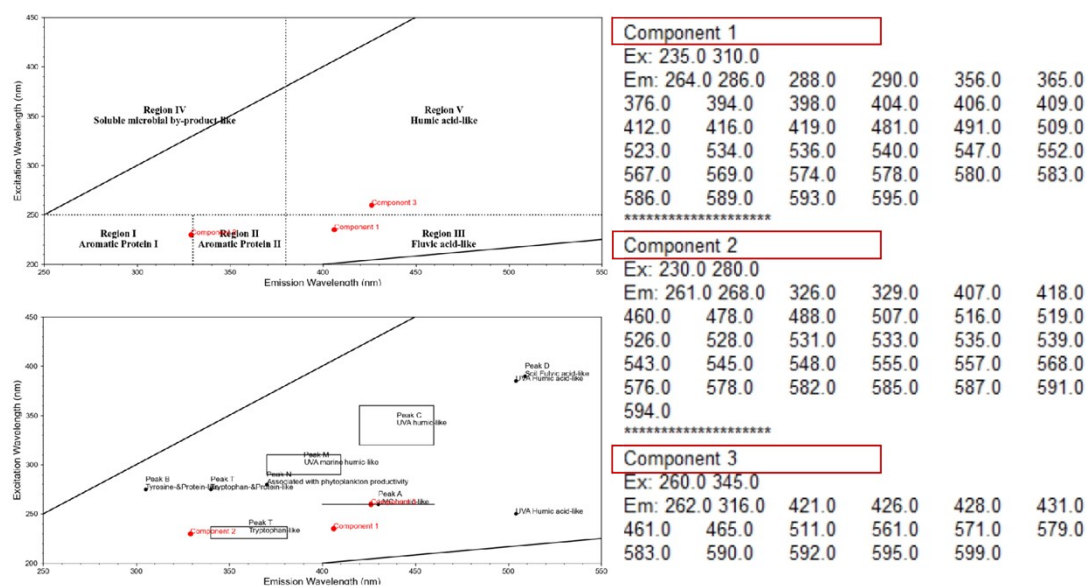

**Fig. S3.** Location of florescent peaks of the three components obtained by PARAFAC.
